# Supplementary material for: Methods for Human Demographic Inference Using Haplotype Patterns From Genomewide Single-Nucleotide Polymorphism Data
Source: Oxford University Press journal article supplement (doi:10.1534/genetics.108.099275), 2009-03-03
Supplement: figures1.pdf [file figures1.pdf]

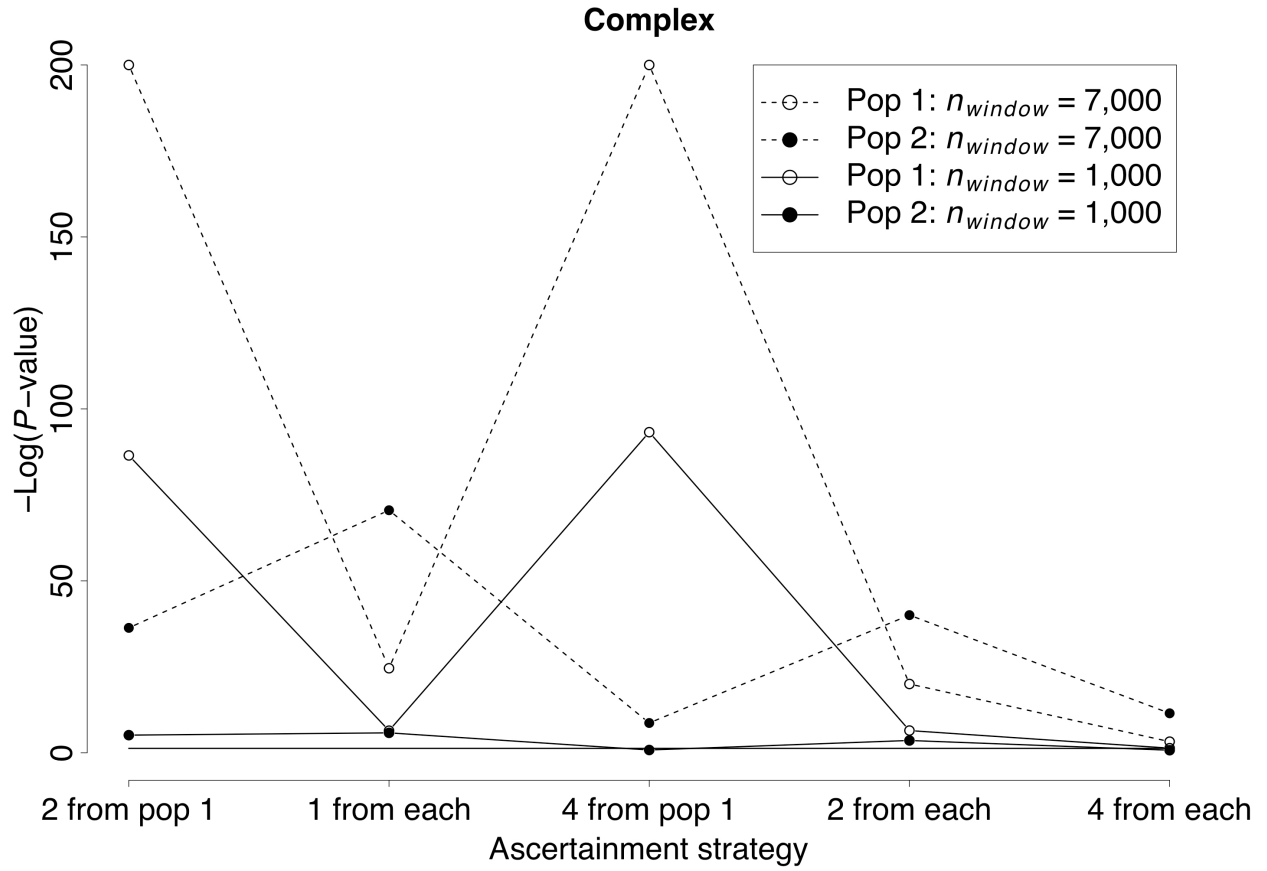

FIGURE S1.— $-\log_{10} P$ -value of the goodness-of-fit test comparing the  $H_{pair}$  statistic under different SNP ascertainment schemes (shown on the x-axis) to that with complete ascertainment for the complex demographic model. Here a sample size of 40 chromosomes from each population is used. The solid horizontal line denotes the 5% significance cutoff.  $P$ -values  $< 10^{-200}$  are set to  $10^{-200}$ .
