# Supplementary material for: Methods for Human Demographic Inference Using Haplotype Patterns From Genomewide Single-Nucleotide Polymorphism Data
Source: Oxford University Press journal article supplement (doi:10.1534/genetics.108.099275), 2009-03-03
Supplement: figures2.pdf [file figures2.pdf]

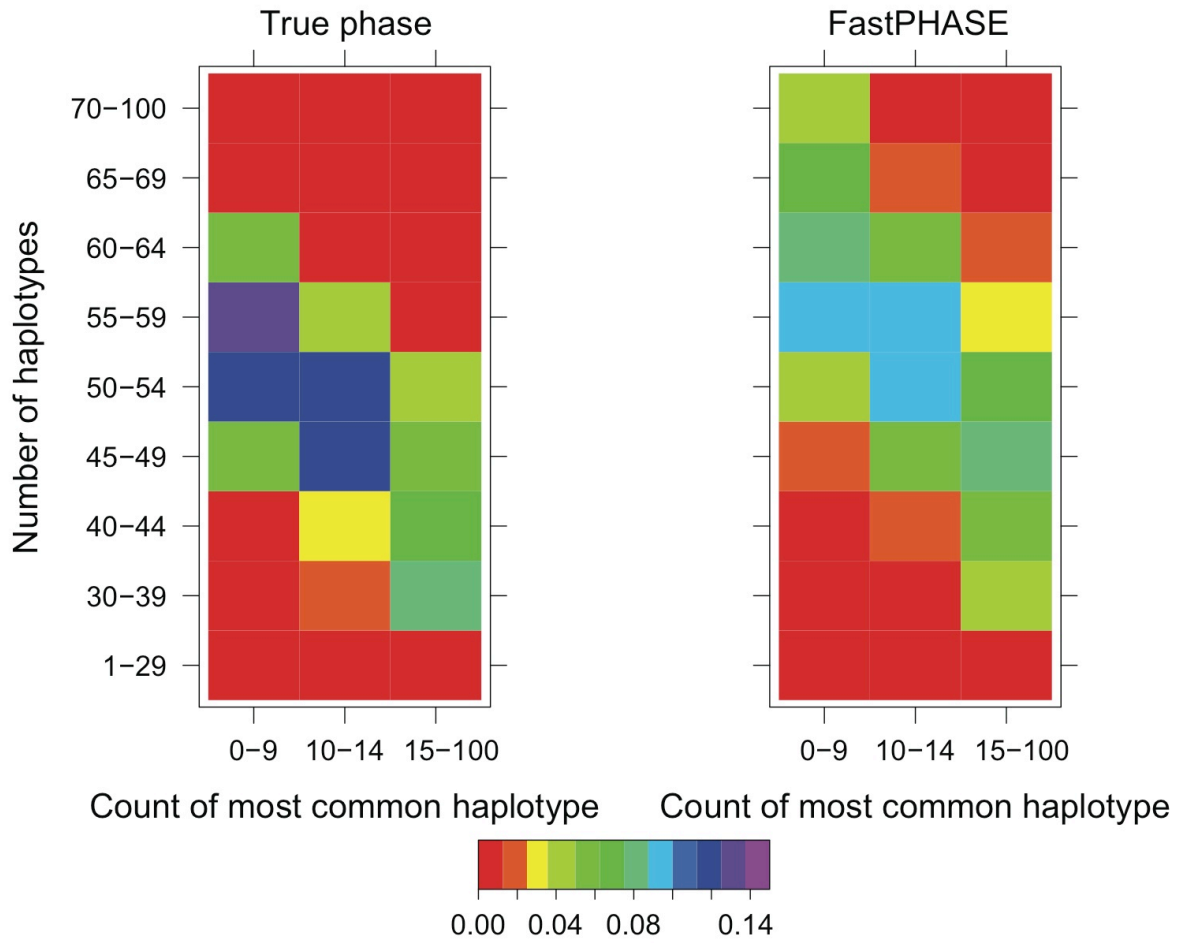

FIGURE S2.—Effect of haplotype phase uncertainty on the  $HCN$  statistic. The  $HCN$  for a bottleneck model (see File S1) when haplotype phase is known (left) and inferred using fastPHASE (right).
