# Supplementary material for: Methods for Human Demographic Inference Using Haplotype Patterns From Genomewide Single-Nucleotide Polymorphism Data
Source: Oxford University Press journal article supplement (doi:10.1534/genetics.108.099275), 2009-03-03
Supplement: figures3.pdf [file figures3.pdf]

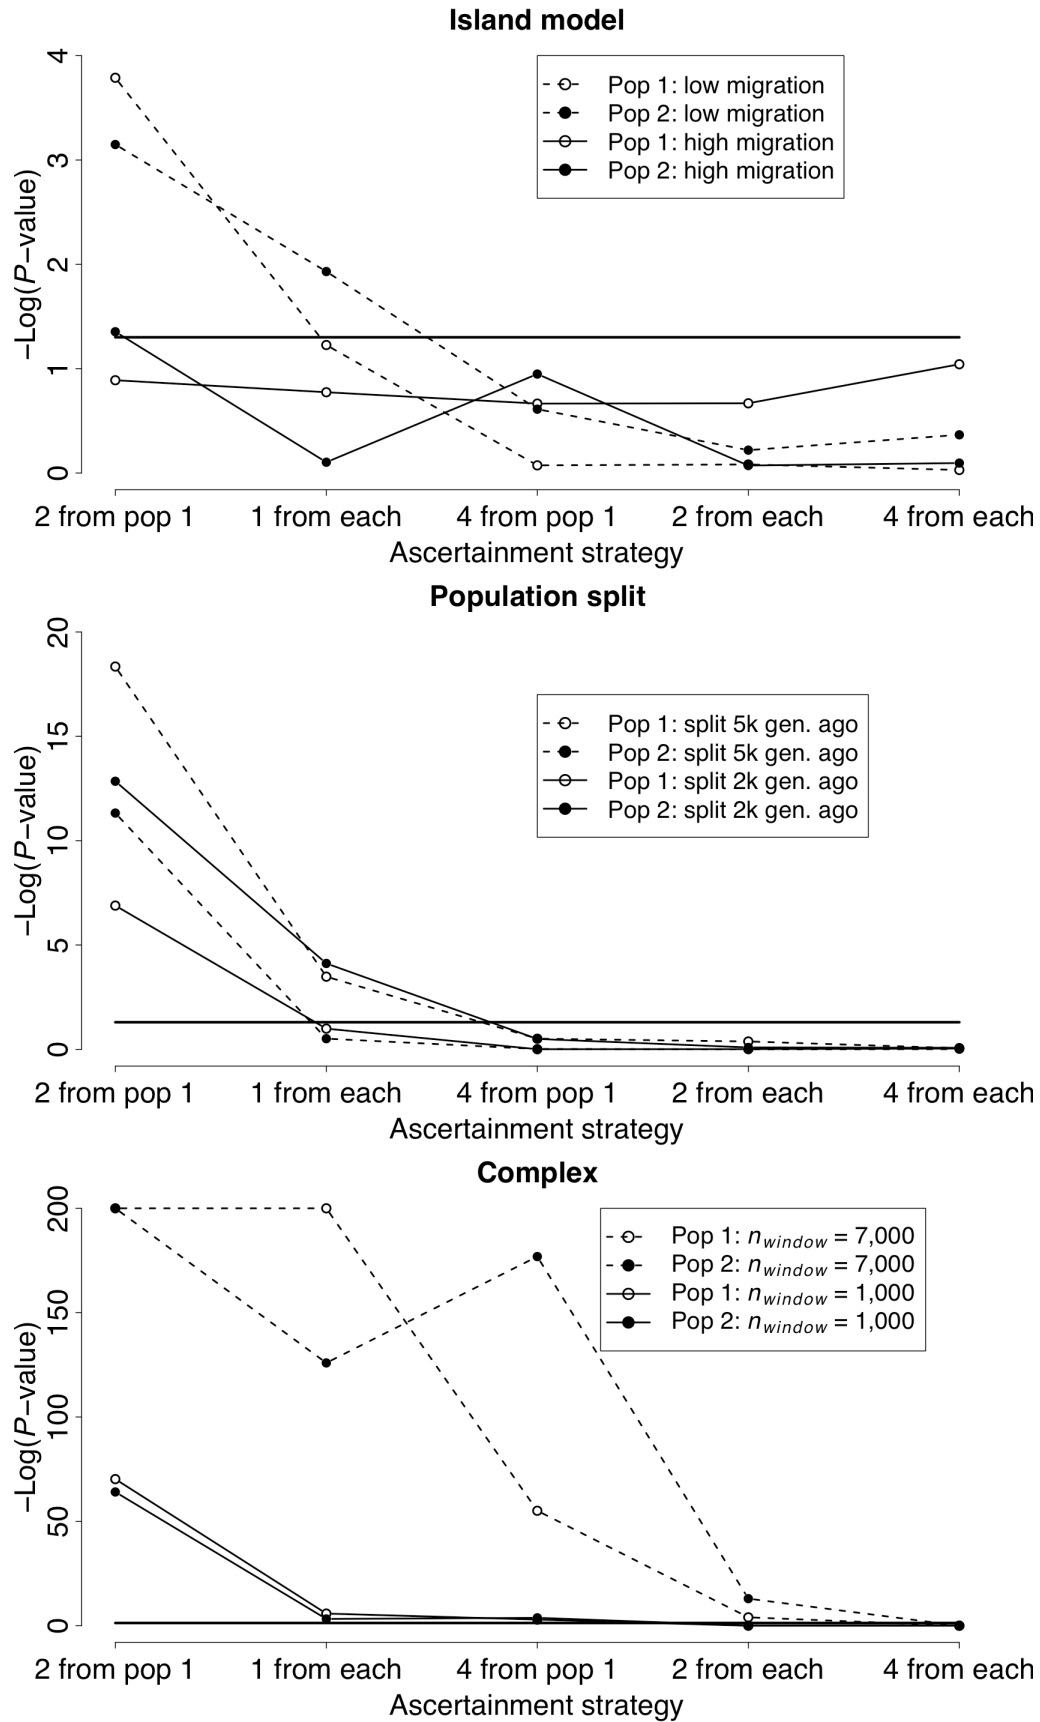

FIGURE S3.— $\text{Log}_{10}$   $P$ -value of the goodness-of-fit test comparing the  $HCN$  statistic under different SNP ascertainment schemes (shown on the x-axis) to that with complete ascertainment for three different demographic models (see File S1). Here a sample size of 40 chromosomes from each population is used. The solid horizontal line in each figure denotes the 5% significance cutoff.  $P$ -values  $< 10^{-200}$  are set to  $10^{-200}$ .
