# Supplementary material for: Methods for Human Demographic Inference Using Haplotype Patterns From Genomewide Single-Nucleotide Polymorphism Data
Source: Oxford University Press journal article supplement (doi:10.1534/genetics.108.099275), 2009-03-03
Supplement: figures4.pdf [file figures4.pdf]

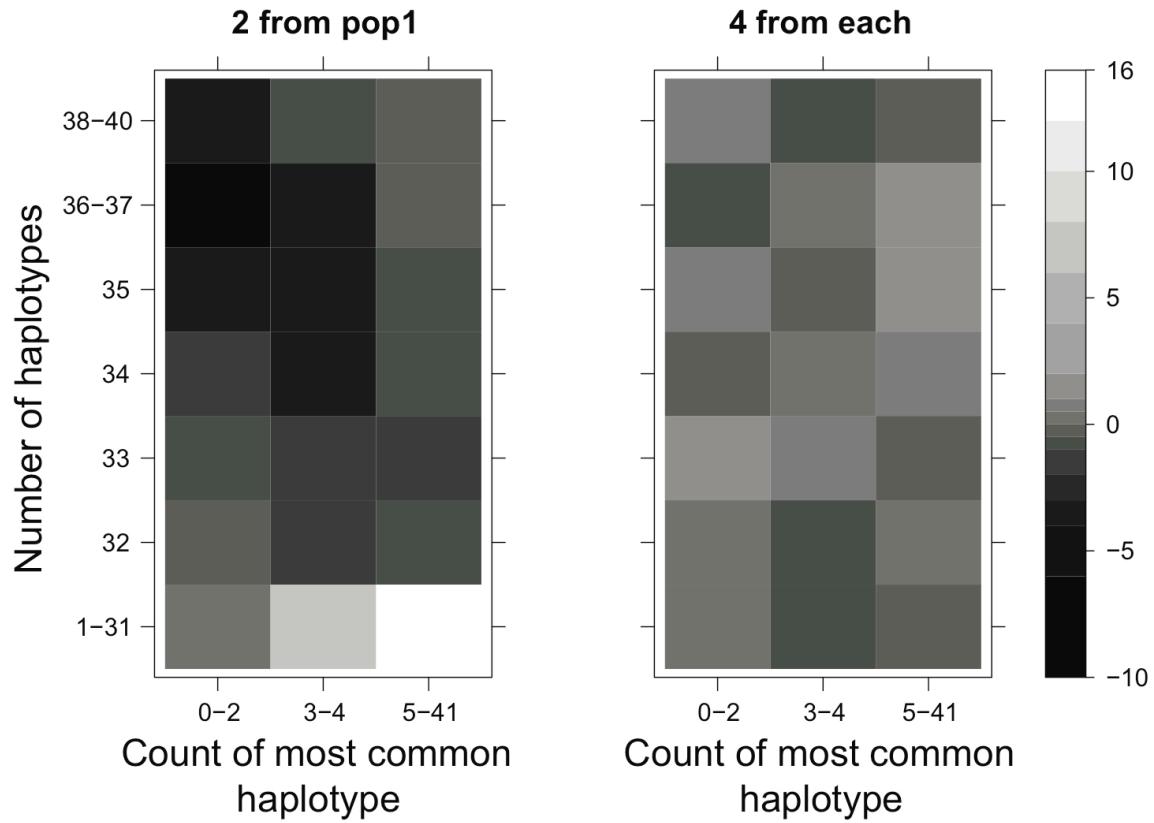

FIGURE S4.—Plot of Pearson’s residuals comparing the *HCN* statistic for two different ascertainment strategies to the expected *HCN* having complete SNP ascertainment for the bottlenecked population (population 1) in the complex demographic model. The two SNP ascertainment strategies compared are SNP ascertainment using 2 chromosomes from population 1 (“2 from pop 1”) and ascertainment using 4 chromosomes from population 1 and 4 from population 2 (“4 from each”). Darker colors indicate a deficit of windows in the particular cell as compared to complete ascertainment. Lighter cell colors indicate an excess of windows in the particular cell as compared to complete ascertainment.
