# Supplementary material for: Methods for Human Demographic Inference Using Haplotype Patterns From Genomewide Single-Nucleotide Polymorphism Data
Source: Oxford University Press journal article supplement (doi:10.1534/genetics.108.099275), 2009-03-03
Supplement: figures8.pdf [file figures8.pdf]

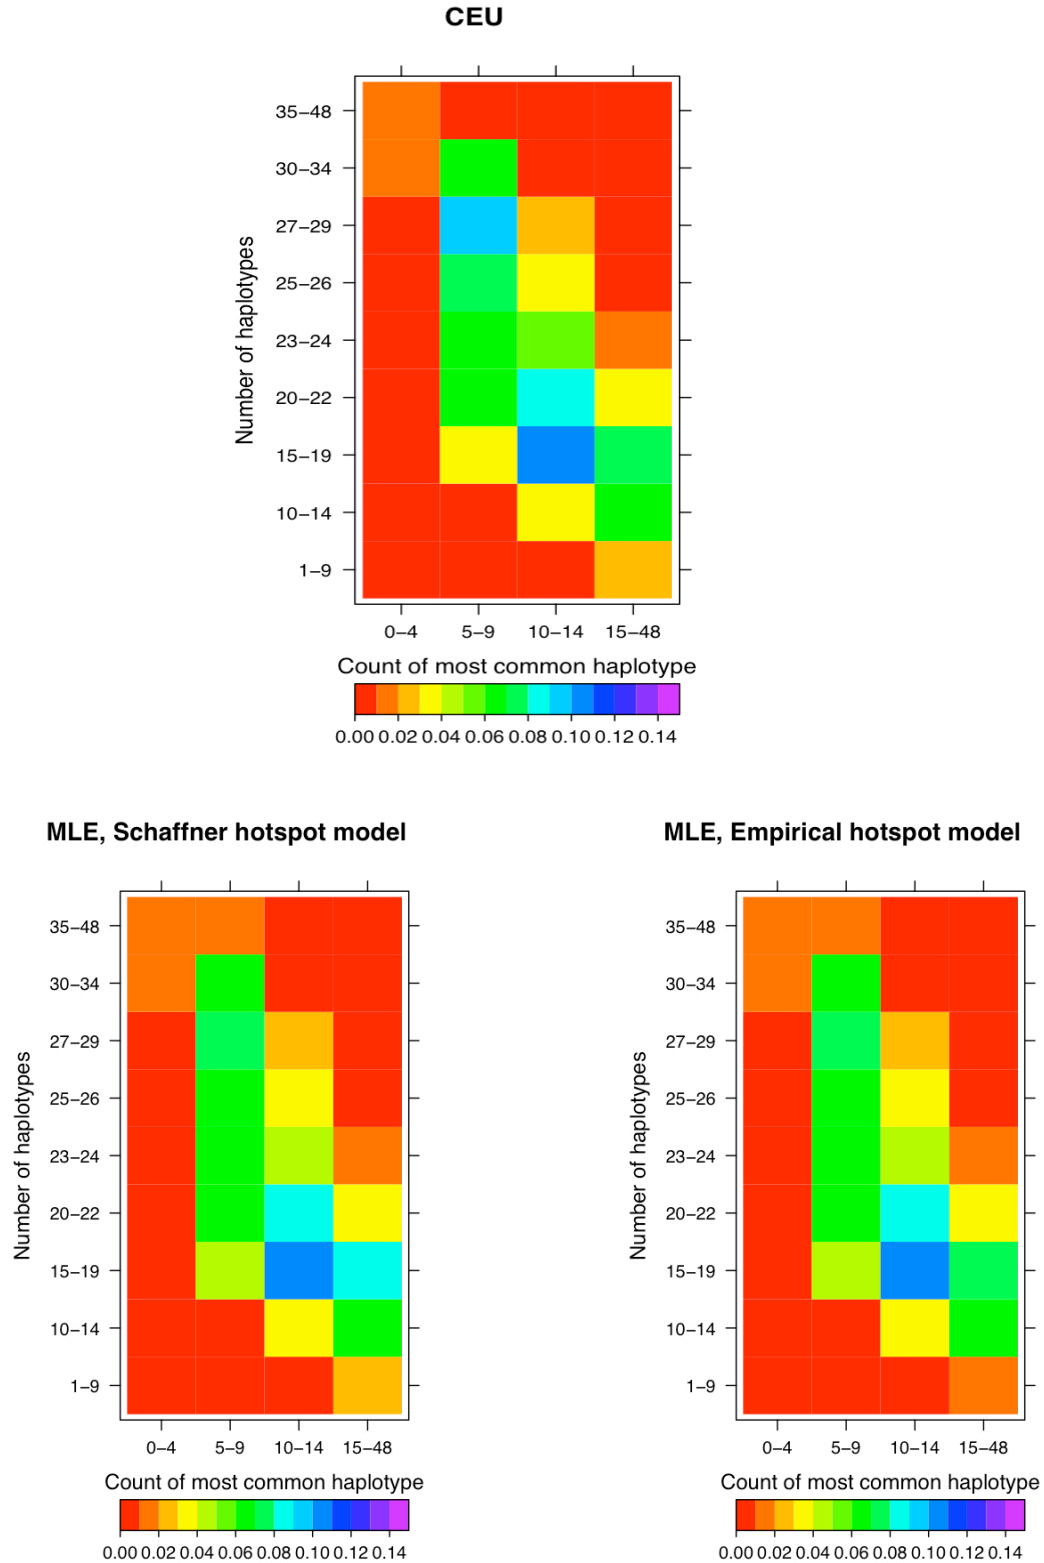

FIGURE S8.—Observed *HCN* statistic for the Perlegen CEU sample and the *HCN* statistics for the best-fitting demographic models based on the Schaffner hotspot model and the empirical hotspot model. Windows based on genetic distance were defined using the LDHat genetic map (see Methods). See Table 2 for the parameter values generating the best-fitting *HCN* statistics. Note, the bins shown in the figure were the same ones used when inferring parameters.
