# Supplementary material for: Methods for Human Demographic Inference Using Haplotype Patterns From Genomewide Single-Nucleotide Polymorphism Data
Source: Oxford University Press journal article supplement (doi:10.1534/genetics.108.099275), 2009-03-03
Supplement: figures9.pdf [file figures9.pdf]

## Schaffner hotspot model

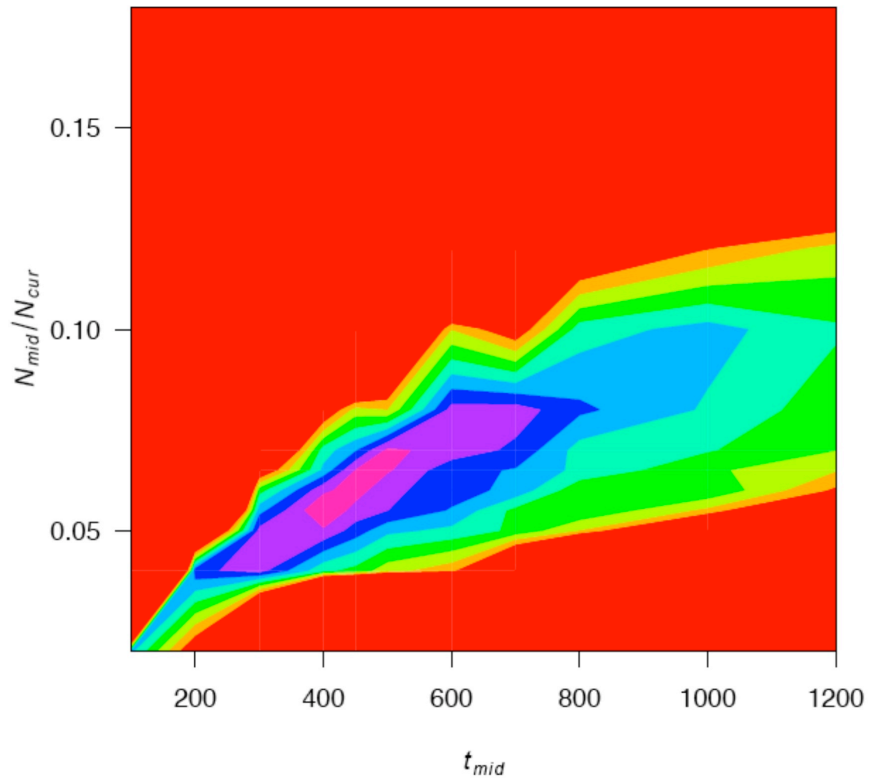

## Empirical hotspot model

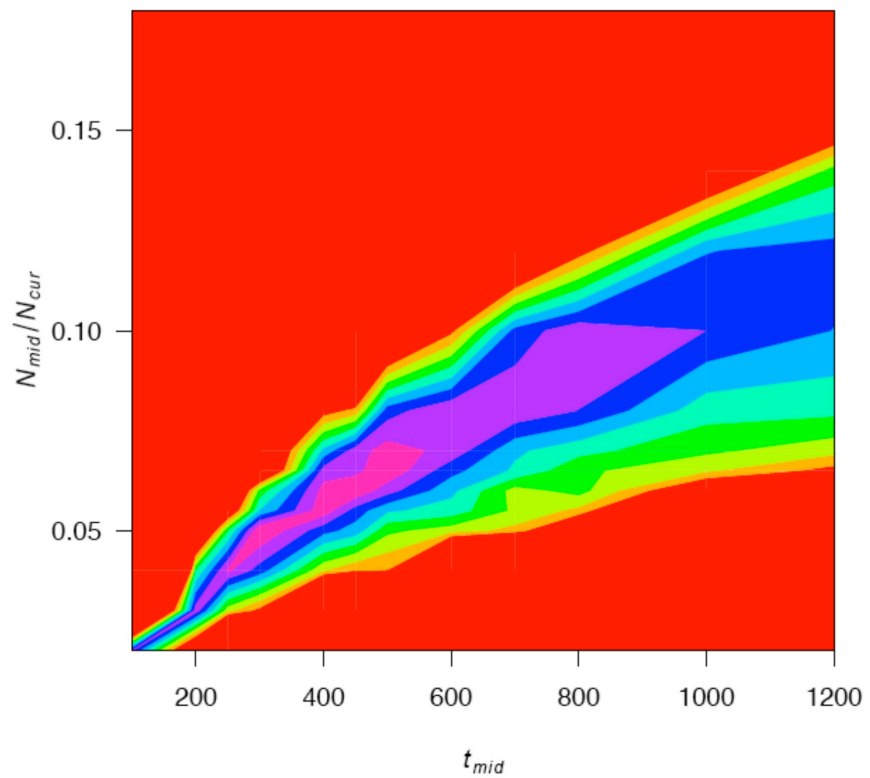

FIGURE S9.—Two dimensional profile likelihood surface for  $t_{mid}$  vs.  $N_{mid}/N_{cur}$  for the Perlegen CEU data inferred using the Schaffner hotspot model and empirical hotspot model. Contours are every 3-log-likelihood units. The inner pink contour denotes the region of points where the log-likelihood is  $< 3$ -log likelihood units from the MLE.
