# Supplementary material for: Methods for Human Demographic Inference Using Haplotype Patterns From Genomewide Single-Nucleotide Polymorphism Data
Source: Oxford University Press journal article supplement (doi:10.1534/genetics.108.099275), 2009-03-03
Supplement: figures10.pdf [file figures10.pdf]

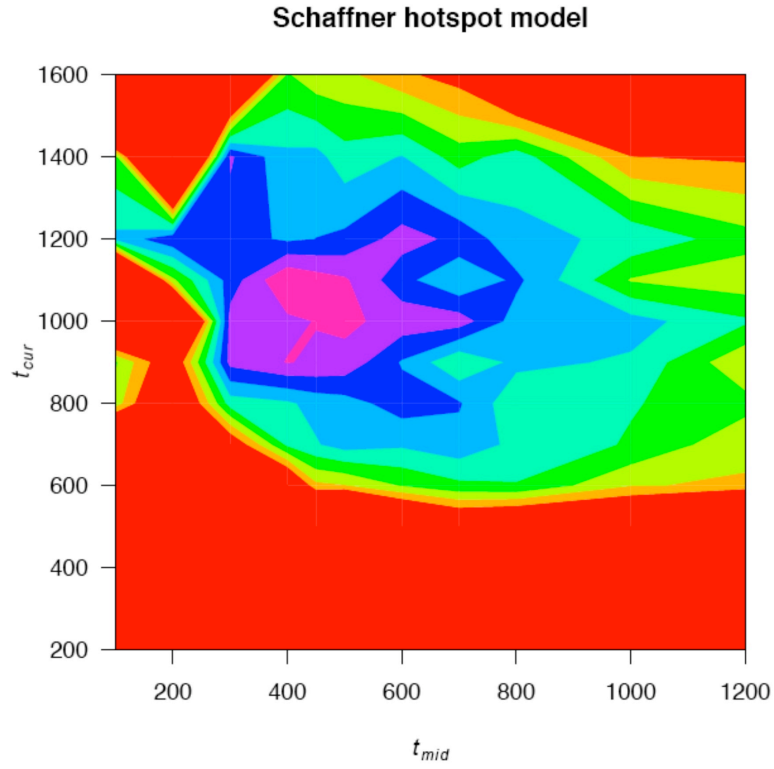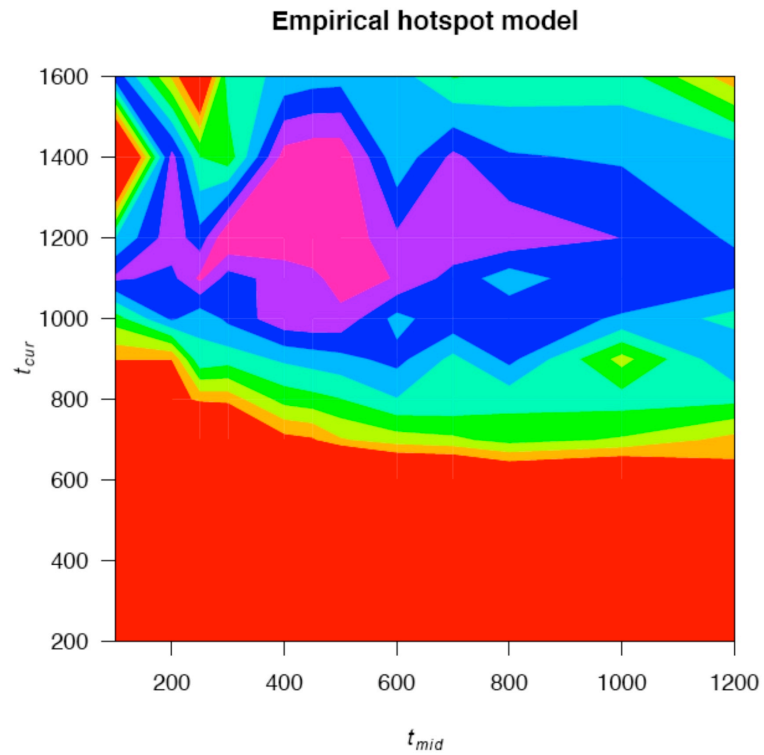

FIGURE S10.—Two-dimensional profile likelihood surface for  $t_{cur}$  vs.  $t_{mid}$  for the Perlegen CEU data inferred using the Schaffner hotspot model and empirical hotspot model. Contours are every 3-log-likelihood units. The inner pink contour denotes the region of points where the log-likelihood is < 3-log likelihood units from the MLE. Note the jaggedness of the contours is due to the relatively coarse grid used to estimate parameters combined with Monte Carlo error.
