# Supplementary material for: Methods for Human Demographic Inference Using Haplotype Patterns From Genomewide Single-Nucleotide Polymorphism Data
Source: Oxford University Press journal article supplement (doi:10.1534/genetics.108.099275), 2009-03-03
Supplement: figures11.pdf [file figures11.pdf]

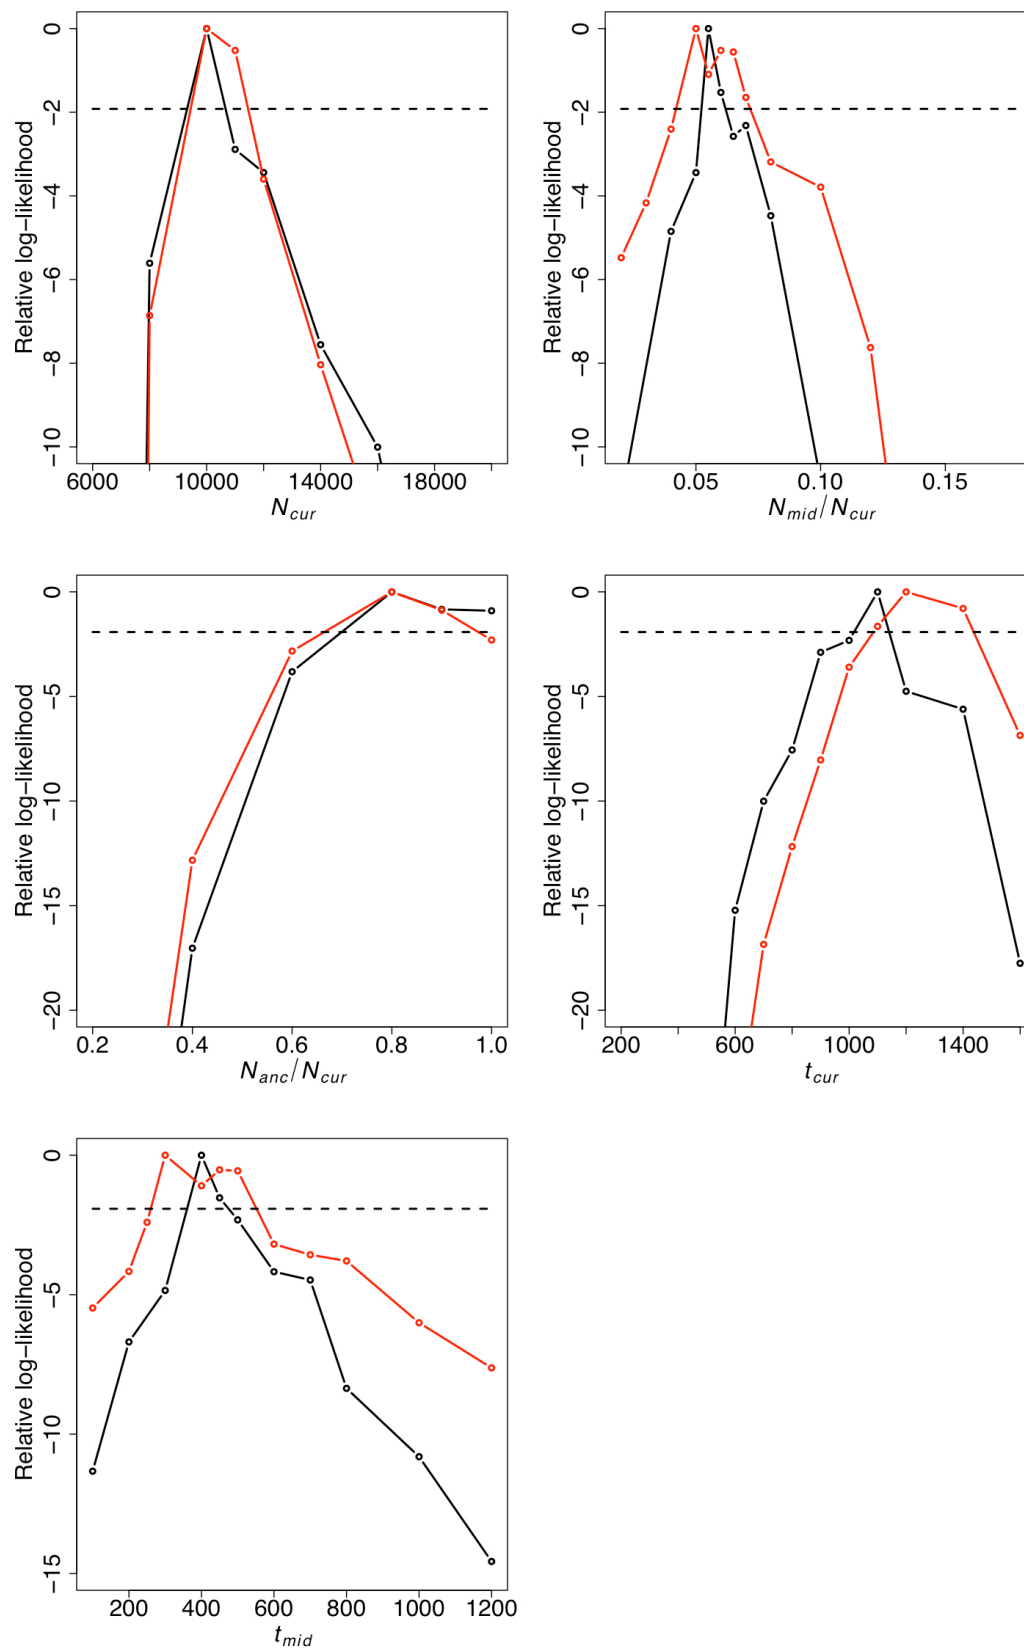

FIGURE S11.—Likelihood profiles for the five CEU bottleneck parameters inferred using the Schaffner hotspot model (black) and the empirical hotspot model (red). The dashed line denotes the approximate 95% confidence interval.
