# Supplementary material for: Methods for Human Demographic Inference Using Haplotype Patterns From Genomewide Single-Nucleotide Polymorphism Data
Source: Oxford University Press journal article supplement (doi:10.1534/genetics.108.099275), 2009-03-03
Supplement: figures12.pdf [file figures12.pdf]

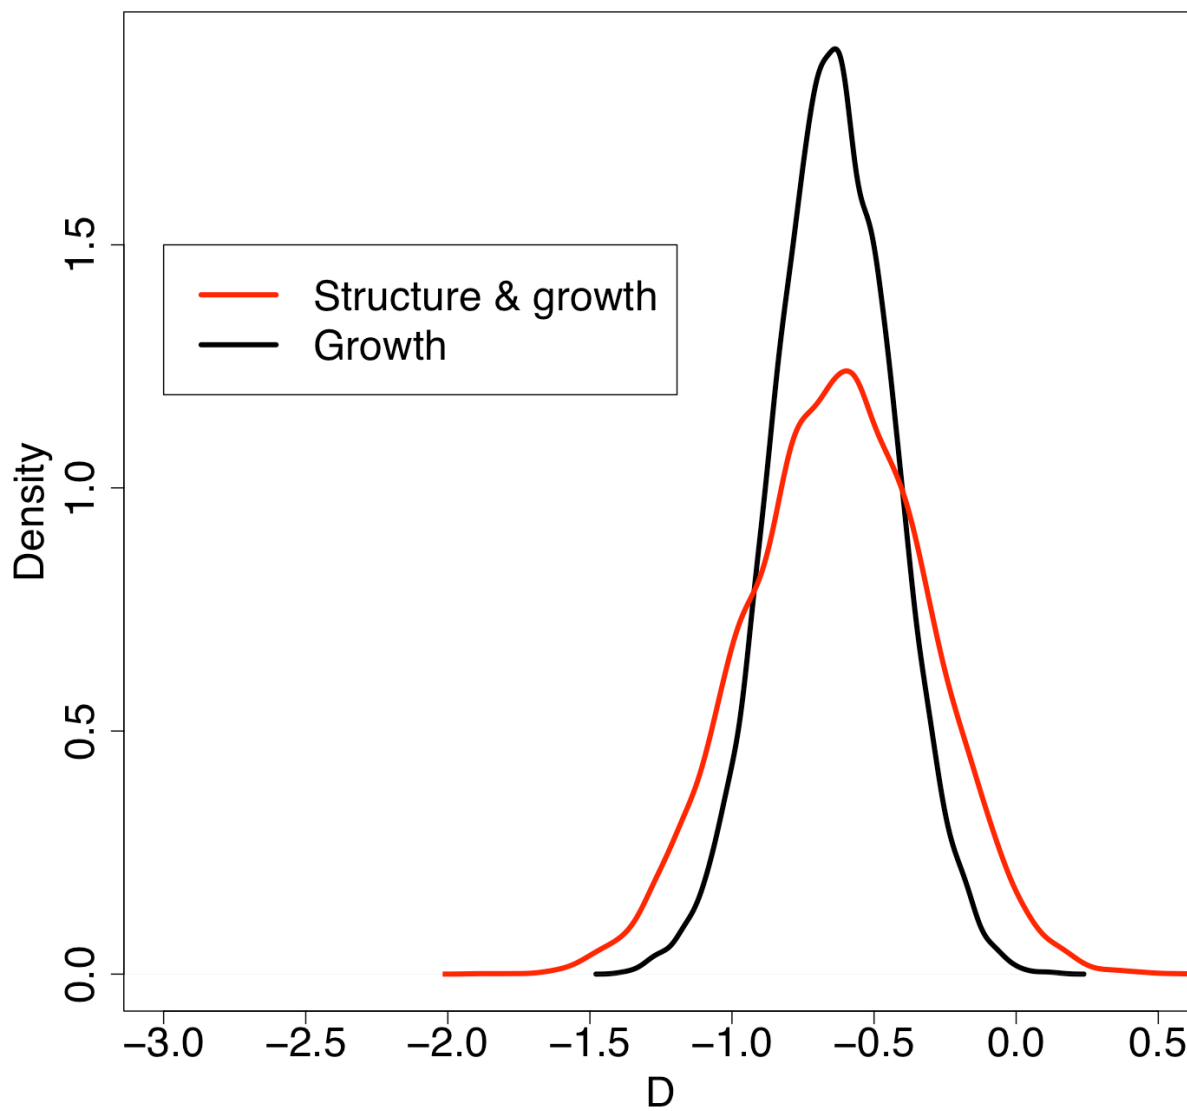

FIGURE S12.—Distribution of Tajima's  $D$  for 10,000 independent 250 kb windows ( $c_{window}=0.25$  cM) simulated under a growth with ancestral structure model (red) and a growth without ancestral structure model (black). Note that while means of the two distributions are similar, the variance is greater in the growth with ancestral structure case.
