# Supplementary material for: Methods for Human Demographic Inference Using Haplotype Patterns From Genomewide Single-Nucleotide Polymorphism Data
Source: Oxford University Press journal article supplement (doi:10.1534/genetics.108.099275), 2009-03-03
Supplement: tables1.pdf [file tables1.pdf]

**TABLE S1****Summary of SNP ascertainment strategies**

| Abbreviation                          | Ascertainment sample description                                      |
|---------------------------------------|-----------------------------------------------------------------------|
| a. Supplemental Figures 1 & 3; $n=40$ |                                                                       |
| 2 from pop 1                          | 2 chromosomes from population 1                                       |
| 1 from each                           | 1 chromosome from population 1 and 1 chromosome from population 2     |
| 4 from pop 1                          | 4 chromosomes from population 1                                       |
| 2 from each                           | 2 chromosomes from population 1 and 2 chromosomes from population 2   |
| 4 from each                           | 4 chromosomes from population 1 and 4 chromosomes from population 2   |
| b. Supplemental Figure 5; $n=120$     |                                                                       |
| 2 from pop 1                          | 2 chromosomes from population 1                                       |
| 1 from each                           | 1 chromosome from population 1 and 1 chromosome from population 2     |
| 4 from pop 1                          | 4 chromosomes from population 1                                       |
| 2 from each                           | 2 chromosomes from population 1 and 2 chromosomes from population 2   |
| 4 from each                           | 4 chromosomes from population 1 and 4 chromosomes from population 2   |
| 12 from pop 1                         | 12 chromosomes from population 1                                      |
| 12 from pop 2                         | 12 chromosomes from population 2                                      |
| 12 from each                          | 12 chromosomes from population 1 and 12 chromosomes from population 2 |
